# Supplementary material
Source: publisher figshare collection journal article supplement (https://acs.figshare.com/ndownloader/files/4718209)
Supplement: Supplementary file 1 [file 4718209]

## Supplementary Material

### Molecular Dynamics Simulations of Inwardly Rectifying (Kir) Potassium Channels: A Comparative Study

*Shozeb Haider, Syma Khalid, Stephen Tucker, Frances M. Ashcroft, & Mark S.P. Sansom*

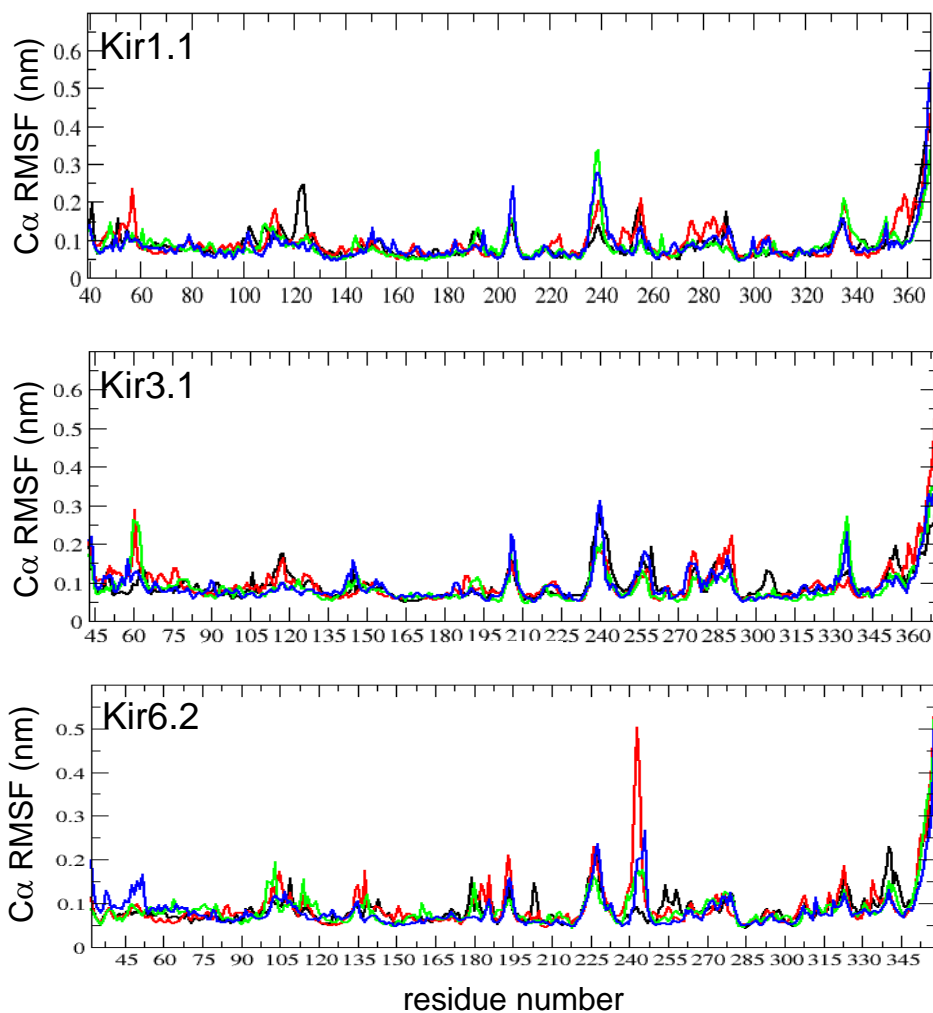

*Figure S1*

C $\alpha$  atom root mean square fluctuation (RMSF) as a function of residue number for the three simulations. In each case, the four differently coloured lines correspond to the four subunits of the channel protein.
